# Supplementary material for: Orthologous endogenous retroviruses exhibit directional selection since the chimp-human split
Source: PubMed Central journal article supplement (PMC4477479; doi:10.1186/s12977-015-0172-6), 2015-06-20

## Supplementary data

Table S1. Site patterns observed across non CpG censored alignments. Patterns were observed at sites classified as one of: ERV (PV); selfish DNA (RM+); or non-repetitive or repetitive but non-selfish (RM-).

| chimp:human | autosomal |         |         | X-linked |        |        |
|-------------|-----------|---------|---------|----------|--------|--------|
|             | PV        | RM+     | RM-     | PV       | RM+    | RM-    |
| A:A         | 591392    | 1603551 | 1145366 | 26509    | 83350  | 43123  |
| A:T         | 888       | 2496    | 1390    | 38       | 105    | 45     |
| A:G         | 6651      | 14093   | 7336    | 242      | 532    | 225    |
| A:C         | 1301      | 3104    | 1860    | 53       | 127    | 55     |
| A:?         | 0         | 0       | 0       | 0        | 0      | 0      |
| T:A         | 984       | 2572    | 1456    | 28       | 90     | 41     |
| T:T         | 597941    | 1609580 | 1151417 | 26035    | 87639  | 43695  |
| T:G         | 1396      | 3302    | 1787    | 58       | 125    | 68     |
| T:C         | 6507      | 13999   | 7213    | 241      | 558    | 247    |
| T:?         | 0         | 0       | 0       | 0        | 0      | 0      |
| G:A         | 6019      | 13776   | 7188    | 241      | 585    | 214    |
| G:T         | 1364      | 3528    | 2002    | 47       | 131    | 56     |
| G:G         | 476441    | 1189167 | 734803  | 23851    | 59232  | 25988  |
| G:C         | 1481      | 3531    | 1942    | 57       | 146    | 73     |
| G:?         | 0         | 0       | 0       | 0        | 0      | 0      |
| C:A         | 1449      | 3442    | 1914    | 38       | 117    | 58     |
| C:T         | 6153      | 13605   | 7195    | 216      | 515    | 249    |
| C:G         | 1420      | 3558    | 1858    | 54       | 119    | 72     |
| C:C         | 486320    | 1182717 | 729658  | 19527    | 58921  | 26391  |
| C:?         | 0         | 0       | 0       | 0        | 0      | 0      |
| ?:A         | 5         | 0       | 2       | 0        | 0      | 0      |
| ?:T         | 0         | 1       | 2       | 0        | 1      | 0      |
| ?:G         | 1         | 0       | 1       | 0        | 1      | 0      |
| ?:C         | 1         | 4       | 0       | 0        | 0      | 0      |
| ?:?         | 0         | 0       | 0       | 0        | 0      | 0      |
| total       | 2187714   | 5666026 | 3804390 | 97235    | 292294 | 140600 |

Table S2. Dinucleotide pattern counts. Patterns were observed at sites classified as one of: ERV (PV); selfish DNA (RM+); or non-repetitive or repetitive but non-selfish (RM-). Pattern classification was performed on both CpG censored and non CpG censored data.

| pattern                              | uncensored |         |        | censored |         |        |
|--------------------------------------|------------|---------|--------|----------|---------|--------|
|                                      | PV         | RM+     | RM-    | PV       | RM+     | RM-    |
| AA-GG   TT-CC   GG-AA   CC-TT        | 67         | 127     | 73     | 36       | 85      | 58     |
| AC-AG   AG-AC   GT-CT   CT-GT        | 1821       | 4630    | 2649   | 1441     | 3921    | 2245   |
| CG-GA   TC-CG   GA-CG   CG-TC        | 24         | 39      | 17     | 20       | 33      | 17     |
| GC-AA   GC-TT   AA-GC   TT-GC        | 32         | 95      | 38     | 21       | 70      | 32     |
| AA-AT   TT-AT   AT-TT   AT-AA        | 1020       | 2941    | 1698   | 1020     | 2941    | 1698   |
| GA-AA   TC-TT   AA-GA   TT-TC        | 4988       | 11606   | 6371   | 2864     | 7494    | 4695   |
| CA-CC   TG-GG   CC-CA   GG-TG        | 1678       | 3807    | 1895   | 1410     | 3172    | 1568   |
| AA-CC   TT-GG   CC-AA   GG-TT        | 16         | 59      | 22     | 13       | 47      | 21     |
| TG-TT   AA-CA   TT-TG   CA-AA        | 1684       | 4456    | 2627   | 1684     | 4456    | 2627   |
| CT-CA   TG-AG   CA-CT   AG-TG        | 1098       | 2773    | 1344   | 1098     | 2773    | 1344   |
| CG-AA   CG-TT   AA-CG   TT-CG        | 28         | 40      | 19     | 28       | 40      | 19     |
| AG-TA   CT-TA   TA-CT   TA-AG        | 13         | 48      | 22     | 13       | 48      | 22     |
| GT-CG   CG-AC   AC-CG   CG-GT        | 7          | 21      | 12     | 6        | 16      | 10     |
| GA-CT   TC-AG   AG-TC   CT-GA        | 4          | 28      | 10     | 4        | 25      | 9      |
| TT-TT   AA-AA                        | 379597     | 1032906 | 788505 | 379597   | 1032906 | 788505 |
| TT-GT   GT-TT   AC-AA   AA-AC        | 1513       | 3743    | 2321   | 1267     | 3230    | 1992   |
| AC-TT   AA-GT   TT-AC   GT-AA        | 19         | 68      | 25     | 18       | 48      | 20     |
| AA-AG   CT-TT   AG-AA   TT-CT        | 4967       | 12324   | 7438   | 4967     | 12324   | 7438   |
| CC-TC   GA-GG   GG-GA   TC-CC        | 4251       | 9014    | 4818   | 3995     | 8651    | 4635   |
| AG-GT   CT-AC   AC-CT   GT-AG        | 25         | 64      | 34     | 21       | 38      | 24     |
| CG-GC   GC-CG                        | 4          | 8       | 3      | 2        | 6       | 1      |
| TT-AG   CT-AA   AG-TT   AA-CT        | 10         | 39      | 14     | 10       | 39      | 14     |
| CT-CC   GG-AG   AG-GG   CC-CT        | 7385       | 13982   | 6660   | 3783     | 8107    | 4422   |
| AG-AG   CT-CT                        | 332695     | 832303  | 535497 | 332695   | 832303  | 535497 |
| AG-GC   GC-CT   CT-GC   GC-AG        | 22         | 67      | 28     | 10       | 40      | 22     |
| CA-AG   CT-TG   AG-CA   TG-CT        | 102        | 227     | 91     | 102      | 227     | 91     |
| CT-GG   CC-AG   AG-CC   GG-CT        | 12         | 38      | 18     | 8        | 34      | 14     |
| TA-GC   GC-TA                        | 2          | 9       | 5      | 2        | 8       | 5      |
| <b>AG-CG   CG-CT   CT-CG   CG-AG</b> | 896        | 1977    | 1128   | 0        | 0       | 0      |
| GC-GC                                | 104712     | 260685  | 147021 | 93799    | 234971  | 133678 |
| TA-CG   CG-TA                        | 45         | 107     | 37     | 45       | 107     | 37     |
| GA-GA   TC-TC                        | 267882     | 700469  | 459056 | 254279   | 672557  | 444606 |
| AT-TA   TA-AT                        | 4          | 16      | 11     | 4        | 16      | 11     |
| AT-CT   AT-AG   CT-AT   AG-AT        | 1462       | 3650    | 2172   | 1462     | 3650    | 2172   |
| AG-CT   CT-AG                        | 12         | 17      | 12     | 12       | 17      | 12     |
| AC-GG   CC-GT   GT-CC   GG-AC        | 30         | 72      | 16     | 17       | 38      | 8      |
| TC-GA   GA-TC                        | 3          | 7       | 9      | 3        | 6       | 5      |

|                                      |        |        |        |        |        |        |
|--------------------------------------|--------|--------|--------|--------|--------|--------|
| AC-AC   GT-GT                        | 221387 | 594562 | 381313 | 209715 | 568402 | 364188 |
| AT-GC   GC-AT                        | 48     | 146    | 57     | 17     | 62     | 30     |
| AT-GA   AT-TC   TC-AT   GA-AT        | 20     | 67     | 27     | 14     | 53     | 20     |
| AC-CC   GG-GT   GT-GG   CC-AC        | 1381   | 3078   | 1529   | 1320   | 2967   | 1456   |
| GA-GC   TC-GC   GC-GA   GC-TC        | 1184   | 2790   | 1404   | 922    | 2255   | 1111   |
| TA-TG   TA-CA   TG-TA   CA-TA        | 4684   | 12823  | 7752   | 4684   | 12823  | 7752   |
| CC-GG   GG-CC                        | 8      | 17     | 3      | 5      | 13     | 3      |
| AC-CA   GT-TG   TG-GT   CA-AC        | 11     | 41     | 20     | 11     | 36     | 19     |
| GC-GG   GC-CC   CC-GC   GG-GC        | 1255   | 2883   | 1456   | 959    | 2339   | 1178   |
| GG-TC   GA-CC   CC-GA   TC-GG        | 6      | 24     | 11     | 4      | 20     | 11     |
| CC-CC   GG-GG                        | 291451 | 631781 | 357328 | 274771 | 601314 | 340033 |
| AT-CG   CG-AT                        | 2      | 4      | 2      | 2      | 4      | 2      |
| <b>CG-TG   CG-CA   CA-CG   TG-CG</b> | 10365  | 19695  | 8493   | 0      | 0      | 0      |
| CA-CA   TG-TG                        | 316037 | 876553 | 540776 | 316037 | 876553 | 540776 |
| CC-AT   AT-GG   GG-AT   AT-CC        | 30     | 63     | 33     | 15     | 44     | 22     |
| AC-GT   GT-AC                        | 61     | 137    | 56     | 17     | 53     | 31     |
| TG-AT   CA-AT   AT-CA   AT-TG        | 7      | 24     | 12     | 7      | 24     | 12     |
| GA-CA   CA-GA   TC-TG   TG-TC        | 1642   | 4399   | 2452   | 1392   | 3869   | 2199   |
| AG-GA   CT-TC   GA-AG   TC-CT        | 79     | 156    | 76     | 43     | 91     | 56     |
| GC-TG   GC-CA   CA-GC   TG-GC        | 5      | 20     | 10     | 4      | 17     | 8      |
| TA-CC   CC-TA   GG-TA   TA-GG        | 14     | 45     | 23     | 12     | 38     | 22     |
| AT-AT                                | 143864 | 431368 | 319021 | 143864 | 431368 | 319021 |
| CA-GG   TG-CC   GG-CA   CC-TG        | 98     | 219    | 62     | 82     | 194    | 60     |
| GA-AC   GT-TC   AC-GA   TC-GT        | 16     | 59     | 20     | 11     | 32     | 12     |
| TG-GA   GA-TG   TC-CA   CA-TC        | 19     | 62     | 20     | 18     | 54     | 19     |
| <b>CG-CG</b>                         | 20819  | 44375  | 26458  | 0      | 0      | 0      |
| TT-AA   AA-TT                        | 5      | 22     | 7      | 5      | 22     | 7      |
| <b>TG-CA   CA-TG</b>                 | 718    | 1179   | 377    | 0      | 0      | 0      |
| TA-TA                                | 130756 | 361441 | 280640 | 130756 | 361441 | 280640 |
| GT-GC   GC-AC   AC-GC   GC-GT        | 5374   | 11537  | 5170   | 2663   | 6296   | 3356   |
| TC-TA   GA-TA   TA-TC   TA-GA        | 1178   | 3012   | 1913   | 1024   | 2691   | 1711   |
| AA-TC   TT-GA   GA-TT   TC-AA        | 13     | 27     | 23     | 12     | 25     | 23     |
| TA-AA   AA-TA   TT-TA   TA-TT        | 887    | 2376   | 1617   | 887    | 2376   | 1617   |
| TT-CA   CA-TT   TG-AA   AA-TG        | 21     | 54     | 17     | 21     | 54     | 17     |
| GT-AT   AC-AT   AT-GT   AT-AC        | 7953   | 18962  | 10935  | 4667   | 12300  | 7413   |
| TA-GT   TA-AC   AC-TA   GT-TA        | 6      | 17     | 11     | 6      | 17     | 11     |
| GA-GT   GT-GA   TC-AC   AC-TC        | 727    | 1915   | 976    | 694    | 1838   | 938    |
| <b>CG-CC   GG-CG   CG-GG   CC-CG</b> | 1061   | 2105   | 1079   | 0      | 0      | 0      |
| TG-AC   AC-TG   CA-GT   GT-CA        | 10     | 34     | 11     | 10     | 31     | 8      |

Table S3. Source organisms for *pol* probes used in this study grouped by ERV class of virus.

|                     | Class I | Class II | Class III | NA |
|---------------------|---------|----------|-----------|----|
| Anseriformes        | 1       | 5        | 0         | 0  |
| Anura               | 9       | 0        | 1         | 0  |
| Apterygiformes      | 0       | 4        | 0         | 0  |
| Artiodactyla        | 10      | 7        | 0         | 0  |
| Caecilia            | 2       | 0        | 2         | 0  |
| Carnivora           | 30      | 4        | 0         | 0  |
| Casuariformes       | 0       | 2        | 0         | 0  |
| Caudata             | 4       | 0        | 0         | 0  |
| Cetacea             | 3       | 1        | 0         | 0  |
| Chiroptera          | 27      | 0        | 0         | 0  |
| Chondrichthyes      | 1       | 0        | 0         | 0  |
| Columbiformes       | 0       | 1        | 0         | 0  |
| Crocodylia          | 1       | 0        | 0         | 0  |
| Cypriniformes       | 1       | 0        | 0         | 0  |
| Didelphimorphia     | 2       | 0        | 1         | 0  |
| Diprotodontia       | 0       | 1        | 0         | 0  |
| Falconiformes       | 1       | 6        | 0         | 0  |
| Galliformes         | 0       | 10       | 0         | 0  |
| Gaviiformes         | 0       | 2        | 0         | 0  |
| Gruiformes          | 0       | 2        | 0         | 0  |
| Insectivora         | 1       | 1        | 0         | 0  |
| Lagomorpha          | 1       | 2        | 0         | 0  |
| Marsupialia         | 2       | 0        | 0         | 0  |
| Marsupialia         | 2       | 2        | 0         | 0  |
| Monotremata         | 3       | 2        | 0         | 0  |
| Insecta             | 0       | 0        | 0         | 2  |
| Fungi               | 0       | 0        | 0         | 2  |
| Passeriformes       | 1       | 11       | 0         | 0  |
| Perciformes         | 1       | 0        | 1         | 0  |
| Perissodactyla      | 1       | 1        | 0         | 0  |
| Phoenicopteriformes | 0       | 1        | 0         | 0  |
| Piciformes          | 0       | 3        | 0         | 0  |
| Pinnipedia          | 1       | 0        | 0         | 0  |

|                  |     |    |    |   |
|------------------|-----|----|----|---|
| Primates         | 198 | 51 | 54 | 0 |
| Rheiformes       | 0   | 2  | 0  | 0 |
| Rodentia         | 249 | 16 | 0  | 0 |
| Scandentia       | 1   | 0  | 0  | 0 |
| Sphenisciformes  | 0   | 1  | 0  | 0 |
| Sphenodontia     | 1   | 0  | 1  | 0 |
| Squamata         | 4   | 2  | 0  | 0 |
| Strigiformes     | 0   | 2  | 0  | 0 |
| Struthioniformes | 0   | 1  | 0  | 0 |
| Teleostii        | 1   | 0  | 0  | 0 |
| Testudines       | 2   | 0  | 0  | 0 |
| Tinamiformes     | 0   | 1  | 1  | 0 |
| Xenarthra        | 1   | 0  | 0  | 0 |

Table S4. Viral diversity of *pol* probes used in this study.

|                   | endogenous | exogenous | exogenous/endogenous |
|-------------------|------------|-----------|----------------------|
| A-type            | 10         | 0         | 0                    |
| Alpharetrovirus   | 2          | 1         | 0                    |
| Avian-IIA         | 7          | 0         | 0                    |
| Avian-IIB         | 8          | 0         | 0                    |
| Betaretrovirus    | 14         | 3         | 2                    |
| Deltaretrovirus   | 0          | 2         | 0                    |
| Dev               | 3          | 0         | 0                    |
| Epsilonretrovirus | 0          | 2         | 0                    |
| ERV-9             | 7          | 0         | 0                    |
| HERV-AC018462     | 4          | 0         | 0                    |
| HERV-AC096774     | 1          | 0         | 0                    |
| HERV-ADP          | 8          | 0         | 0                    |
| HERV-E            | 8          | 0         | 0                    |
| HERV-F            | 3          | 0         | 0                    |
| HERV-F type_b     | 7          | 0         | 0                    |
| HERV-F type_c     | 2          | 0         | 0                    |
| HERV-FRD          | 2          | 0         | 0                    |
| HERV-H            | 57         | 0         | 0                    |
| HERV-I            | 14         | 0         | 0                    |
| HERV-K(HML2)      | 14         | 0         | 0                    |
| HERV-K(HML5)      | 14         | 0         | 0                    |
| HERV-K(HML6)      | 9          | 0         | 0                    |
| HERV-K(HML9)      | 3          | 0         | 0                    |
| HERV-L            | 44         | 0         | 0                    |
| HERV-L type_b     | 7          | 0         | 0                    |
| HERV-P            | 5          | 0         | 0                    |
| HERV-R            | 7          | 0         | 0                    |
| HERV-R type_b     | 3          | 0         | 0                    |
| HERV-R type_c     | 3          | 0         | 0                    |
| HERV-S            | 5          | 0         | 0                    |
| HERV-T            | 13         | 0         | 0                    |
| HERV-U3           | 1          | 0         | 0                    |
| HERV-W            | 16         | 0         | 0                    |

|                      |     |   |   |
|----------------------|-----|---|---|
| HERV-XA              | 4   | 0 | 0 |
| HERV-Z69907          | 5   | 0 | 0 |
| Lentivirus           | 0   | 4 | 0 |
| LPDV-group           | 3   | 1 | 0 |
| LTR-retrotransposons | 4   | 0 | 0 |
| RRHERV-I             | 9   | 0 | 0 |
| SpeV                 | 1   | 0 | 0 |
| spumavirus           | 0   | 4 | 0 |
| Unclassified         | 416 | 5 | 4 |

Table S5. The model of fitness effects of mutations into ERVs (PV) used in this study.

|         |   |          | male     |             |           | female   |             |           |
|---------|---|----------|----------|-------------|-----------|----------|-------------|-----------|
| linkage | A | genotype | $A_1A_1$ | $A_1A_2$    | $A_2A_2$  | $A_1A_1$ | $A_1A_2$    | $A_2A_2$  |
|         |   | fitness  | 1        | $1 + h s_m$ | $1 + s_m$ | 1        | $1 + h s_f$ | $1 + s_f$ |
|         |   |          |          |             |           |          |             |           |
|         | X | genotype | $A_1$    |             | $A_2$     | $A_1A_1$ | $A_1A_2$    | $A_2A_2$  |
|         |   | fitness  | 1        |             | $1 + s_m$ | 1        | $1 + h s_f$ | $1 + s_f$ |
|         |   |          |          |             |           |          |             |           |



Figure S1. GC content of PV region by ERV kind. ERV kind was assigned using the best matching viral *pol* probe (see Detecting ERVs in Methods and Additional File 2).

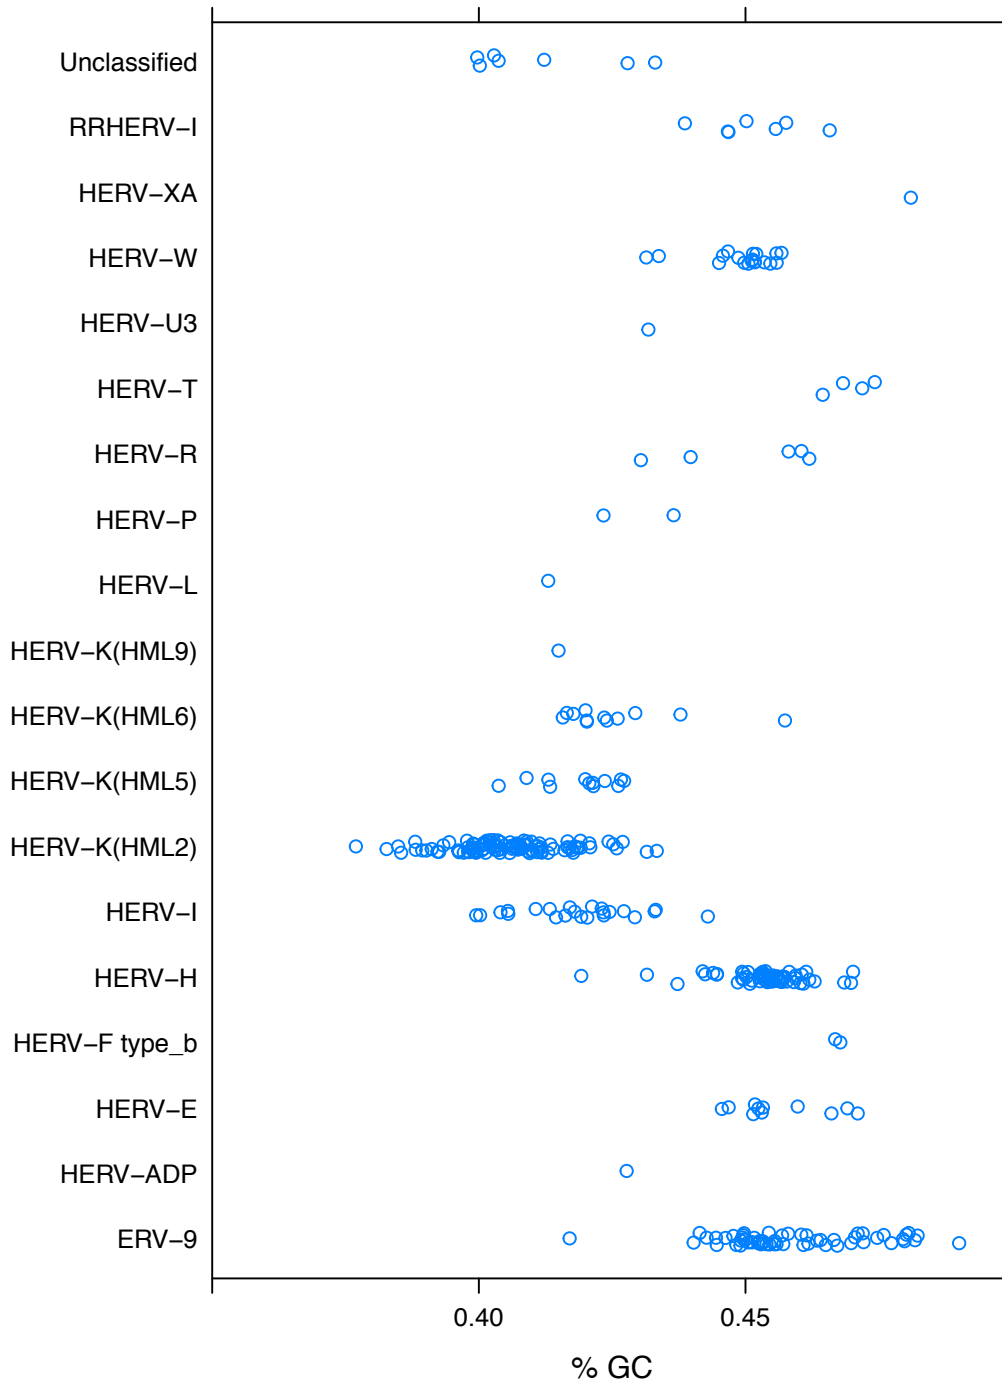

Figure S2. Dinucleotide frequencies grouped by sequence classification and transition count:  
no transition (0); single transition (1); double transition (2).

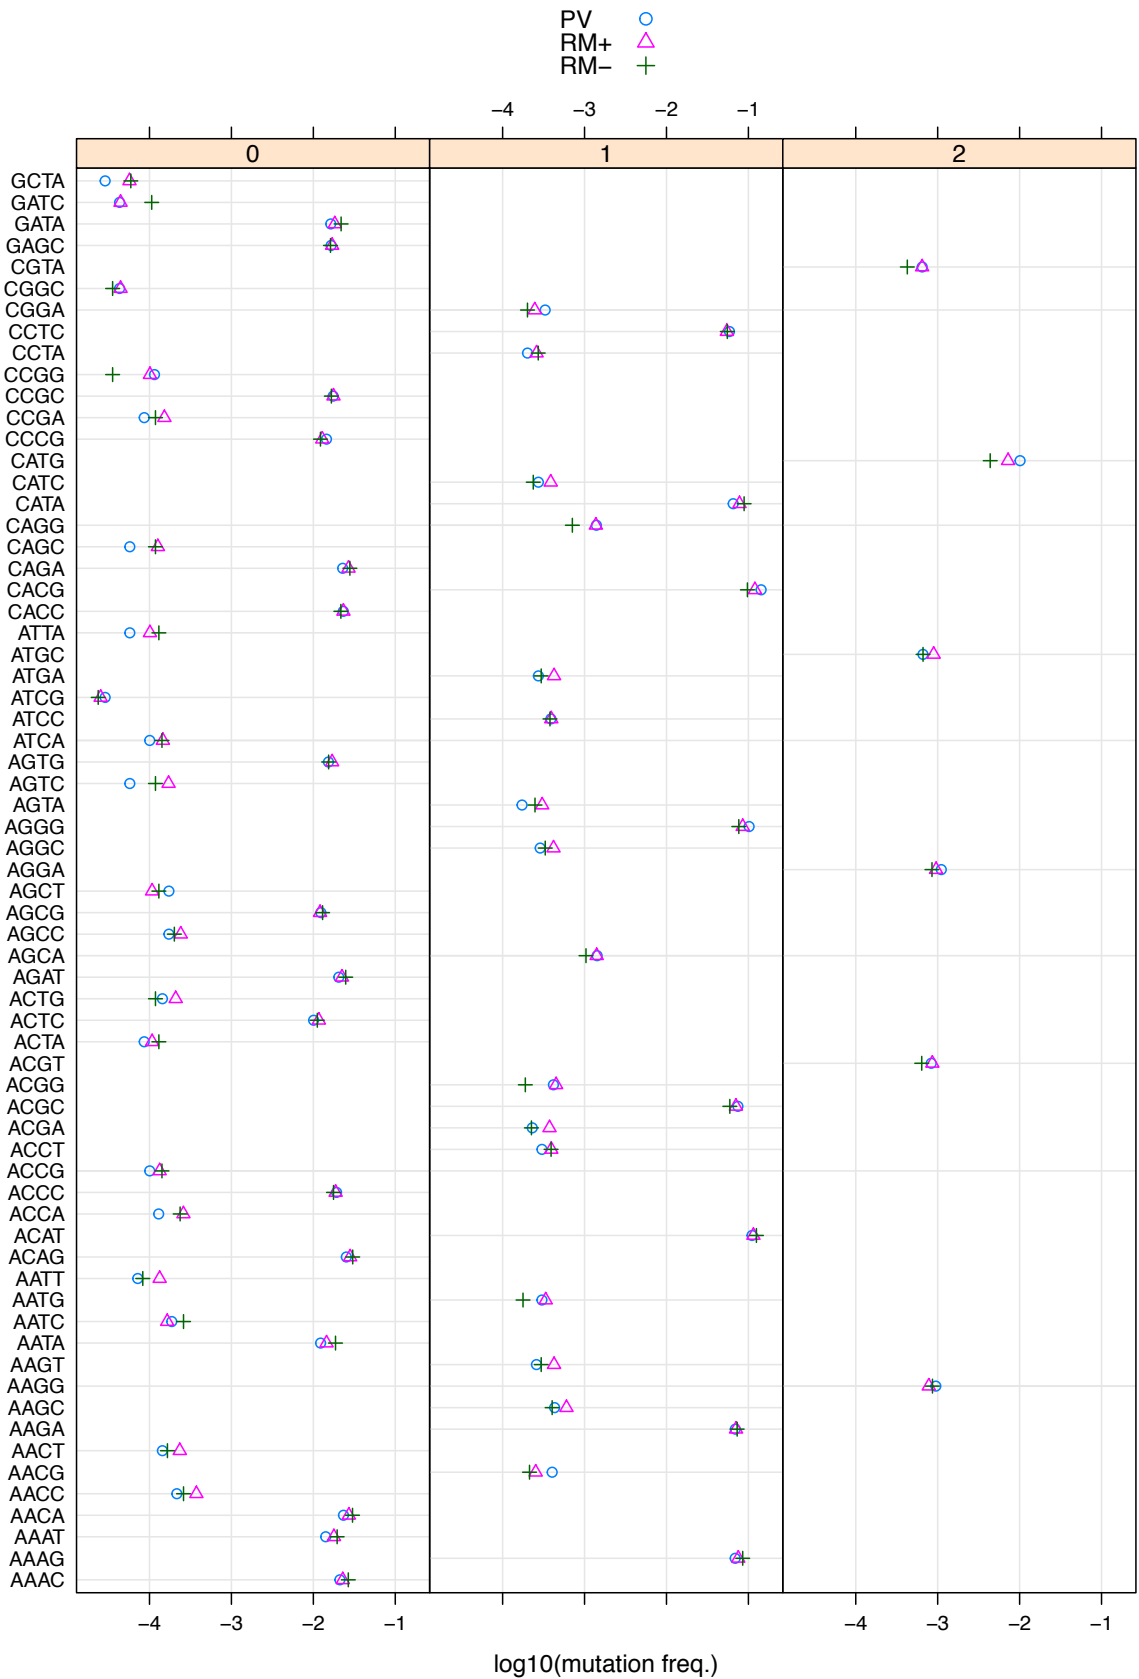

Figure S3. Distribution of divergence of ERVs (PV) and other selfish DNA (RM+) versus paired non-repetitive or non-selfish flank (RM-).

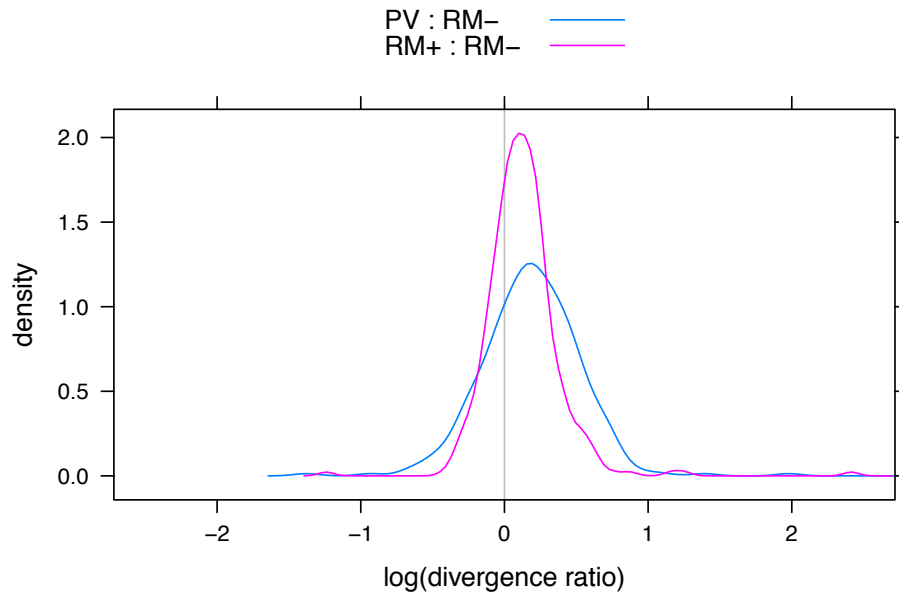

Supplement: 12977_2015_172_MOESM1_ESM.pdf [file 12977_2015_172_MOESM1_ESM.pdf]
